# Supplementary material for: Effect of number of medications and complexity of regimens on medication adherence and blood pressure management in hospitalized patients with hypertension
Source: PubMed Central journal article supplement (PMC8191947; doi:10.1371/journal.pone.0252944), 2021-06-10
Supplement: pone.0252944.s001.pdf [file pone.0252944.s001.pdf]

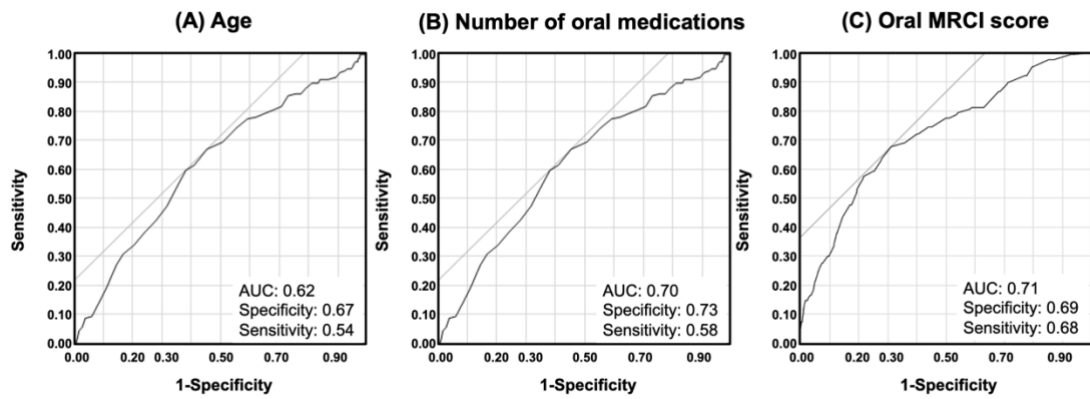

**S1 Fig. The ROC curve of the age (A), number of oral medications (B), and oral MRCI score (C) for poor adherence.**

Cut-off values of continuous variables were determined by receiver operating characteristics (ROC) curve method.

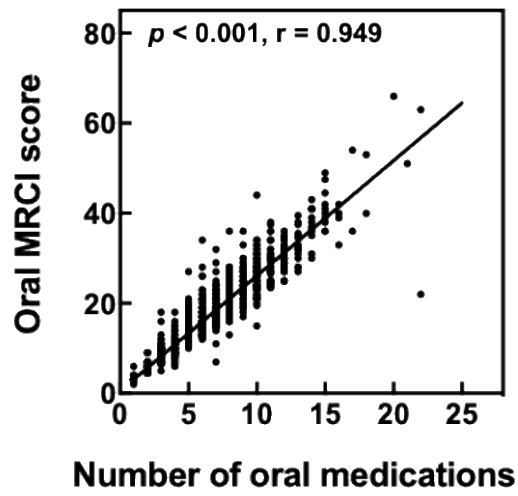

**S2 Fig. Correlation between number of oral medications and oral MRCI score**

Statistical analysis was performed using Spearman correlation coefficient. Each point represents a patient.

**S1 Table. A list of highest dosing frequencies in section B**

|    | Medicine                                               |
|----|--------------------------------------------------------|
| 1  | Acetaminophen                                          |
| 2  | Adenine                                                |
| 3  | Sodium Alginate                                        |
| 4  | Alprazolam                                             |
| 5  | Ambroxol                                               |
| 6  | Benfotiamine, Pyridoxine Hydrochloride, Cyanocobalamin |
| 7  | Benzbromarone                                          |
| 8  | Bifidobacterium Lactomin                               |
| 9  | L-Carbocysteine                                        |
| 10 | Camostat Mesilate                                      |
| 11 | Cefcapene Pivoxil Hydrochloride Hydrate                |
| 12 | Dextromethorphan Hydrochloride Hydrate                 |
| 13 | Domperidone                                            |
| 14 | Duloxetine Hydrochloride                               |
| 15 | Ethyl Icosapentate                                     |
| 16 | Etizolam                                               |
| 17 | Fluconazole                                            |
| 18 | Ifenprodil Tartrate                                    |
| 19 | Isosorbide                                             |
| 20 | Lanthanum Carbonate Hydrate                            |
| 21 | Limaprost Alfadex                                      |
| 21 | Loxoprofen Sodium Hydrate                              |
| 23 | Magnesium oxide                                        |
| 24 | Mecobalamin                                            |
| 25 | Mosapride Citrate Hydrate                              |
| 26 | Naproxen                                               |
| 27 | Nicergoline                                            |
| 28 | Pancrelipase                                           |
| 29 | Phenobarbital                                          |
| 30 | Phenytoin                                              |
| 31 | Potassium Gluconate                                    |
| 32 | Prochlorperazine Maleate                               |
| 33 | Rebamipide                                             |
| 34 | Riociguat                                              |
| 35 | Sildenafil Citrate                                     |
| 36 | Sofalcone                                              |
| 37 | Teprenone                                              |
| 38 | Tocopherol Nicotinate                                  |
| 39 | Tramadol Hydrochloride                                 |
| 40 | Ursodeoxycholic acid                                   |
| 41 | Clostridium butyricum                                  |
| 42 | Voglibose                                              |

**S2 Table. Examples of medication regimens in a patient with high MRCI score (A) and low MRCI score (B).**

(A)

|    | Medicine                            | Dosing frequency                           | Oral MRCI score |    |    |       |
|----|-------------------------------------|--------------------------------------------|-----------------|----|----|-------|
|    |                                     |                                            | A               | B  | C  | Total |
| 1  | Lanthanum Carbonate Hydrate tablet  | 1 tablet, 3 times daily, right after meals | 5               | 38 | 23 | 66    |
| 2  | Bepotastine Besilate tablet         | 1 tablet, once daily, after meals          |                 |    |    |       |
| 3  | Sofalcone powder                    | 1 package, 3 times daily, after meals      |                 |    |    |       |
| 4  | Furosemide tablet                   | 1 tablet, once daily, after meals          |                 |    |    |       |
| 5  | Teprenone capsule                   | 1 capsule, 3 times daily, after meals      |                 |    |    |       |
| 6  | Lomerizine Hydrochloride tablet     | 1 tablet, twice daily, after meals         |                 |    |    |       |
| 7  | Vildagliptin tablet                 | 1 tablet, once daily, after meals          |                 |    |    |       |
| 8  | Nifedipine CR tablet                | 1 tablet, once daily, after meals          |                 |    |    |       |
| 9  | Carvedilol tablet                   | 1 tablet, once daily, after meals          |                 |    |    |       |
| 10 | Alfacalcidol capsule                | 1 tablet, once daily, after meals          |                 |    |    |       |
| 11 | Spirolactone tablet                 | 1 tablet, once daily, after meals          |                 |    |    |       |
| 12 | Pitavastatin Calcium Hydrate tablet | 1 tablet, once daily, after meals          |                 |    |    |       |
| 13 | Nalfurafine Hydrochloride tablet    | 1 tablet, once daily, after meals          |                 |    |    |       |
| 14 | Loxoprofen Sodium Hydrate tablet    | 1 tablet, 3 times daily, after meals       |                 |    |    |       |
| 15 | Rebamipide tablet                   | 1 tablet, 3 times daily, after meals       |                 |    |    |       |
| 16 | Sennoside tablet                    | 2 tablets, once daily, at bedtime          |                 |    |    |       |
| 17 | Magnesium Oxide tablet              | 1 tablet, 3 times daily, after meals       |                 |    |    |       |
| 18 | Domperidone tablet                  | 1 tablet, twice daily, before meals        |                 |    |    |       |
| 19 | Lansoprazole tablet                 | 1 tablet, once daily, after meals          |                 |    |    |       |
| 20 | Sodium Alginate syrup               | 20 mL, 3 times daily, before meals         |                 |    |    |       |
| 21 | Febuxostat tablet                   | 1 tablet, once daily, after meals          |                 |    |    |       |
| 22 | Aspirin tablet                      | 1 tablet, once daily, after meals          |                 |    |    |       |

(B)

|   | Medicine                   | Dosing frequency                  | Oral MRCI score |   |   |       |
|---|----------------------------|-----------------------------------|-----------------|---|---|-------|
|   |                            |                                   | A               | B | C | Total |
| 1 | Amlodipine Besilate tablet | 1 tablet, once daily, after meals | 1               | 1 | 1 | 3     |

**S3 Table. The values used to build graphs in Figure**

| Fig 1A groups                  | Rate of poor adherence (%) | Number of poor adherence patients | Number of all patients |
|--------------------------------|----------------------------|-----------------------------------|------------------------|
| Age < 71 years and MRCI < 19.5 | 4                          | 17                                | 388                    |
| Age < 71 years and MRCI ≥ 19.5 | 24                         | 37                                | 152                    |
| Age ≥ 71 years and MRCI < 19.5 | 13                         | 40                                | 313                    |
| Age ≥ 71 years and MRCI ≥ 19.5 | 34                         | 70                                | 204                    |

| Fig 1B groups                  | Rate of poor blood pressure management (%) | Number of poor blood pressure management patients | Number of all patients |
|--------------------------------|--------------------------------------------|---------------------------------------------------|------------------------|
| Age < 71 years and MRCI < 19.5 | 20                                         | 77                                                | 388                    |
| Age < 71 years and MRCI ≥ 19.5 | 61                                         | 93                                                | 152                    |
| Age ≥ 71 years and MRCI < 19.5 | 21                                         | 65                                                | 313                    |
| Age ≥ 71 years and MRCI ≥ 19.5 | 57                                         | 116                                               | 204                    |

| Fig 2 groups                   | Rate of readmission (%) | Number of readmission patients | Number of all patients |
|--------------------------------|-------------------------|--------------------------------|------------------------|
| Age < 71 years and MRCI < 19.5 | 2                       | 6                              | 388                    |
| Age < 71 years and MRCI ≥ 19.5 | 13                      | 20                             | 152                    |
| Age ≥ 71 years and MRCI < 19.5 | 4                       | 13                             | 313                    |
| Age ≥ 71 years and MRCI ≥ 19.5 | 15                      | 30                             | 204                    |
